# Supplementary material
Source: Royal Society of Chemistry journal article supplement (doi:10.1039/d6qi00601a)
Supplement: d6qi00601a1.pdf [file d6qi00601a1.pdf]

## Supporting Information

### A Promising Mid-Infrared Nonlinear Optical Crystal with Well-balanced Properties

Yujun Wang,<sup>#,a</sup> Yuning Qi,<sup>#,a</sup> Yongkuan Xu,<sup>\*,a</sup> Ning Ye,<sup>a</sup> Zhanggui Hu,<sup>a</sup> and Conggang Li<sup>\*,a,b</sup>

<sup>a</sup>State Key Laboratory of Crystal Materials, Tianjin Key Laboratory of Functional Crystal Materials, Institute of Functional Crystal, Tianjin University of Technology, Tianjin 300384, China

<sup>b</sup>State Key Laboratory of Crystal Materials and Institute of Crystal Materials, Shandong University, Jinan 250100, China.

**Corresponding Author** \*E-mail: Xu\_yk@email.tjut.edu.cn; cgli@email.tjut.edu.cn (C. L.)

|                   |   |
|-------------------|---|
| Table of Contents |   |
| Table S1.....     | 2 |
| Table S2.....     | 3 |
| Table S3.....     | 4 |
| Table S4.....     | 4 |
| Figure S1 .....   | 5 |
| Figure S2 .....   | 5 |
| Reference.....    | 6 |

Table S1. Atomic coordinates ( $\times 10^4$ ) and equivalent isotropic displacement parameters ( $\text{\AA}^2 \times 10^3$ ) and the bond valence sum of  $\text{PbZnGeO}_4$  in asymmetric unit.

| Atom   | x        | y       | z        | U(eq) | BVS   |
|--------|----------|---------|----------|-------|-------|
| Pb(01) | 3507(1)  | 5570(1) | 1048(2)  | 13(1) | 1.66  |
| Pb(02) | 4600(1)  | 7667(1) | 10737(2) | 15(1) | 1.735 |
| Ge(03) | 2974(2)  | 6764(1) | 5477(5)  | 9(1)  | 4.008 |
| Ge(04) | 7673(2)  | 5736(1) | 377(5)   | 8(1)  | 3.958 |
| Zn(5)  | 10035(3) | 4436(1) | 457(5)   | 10(1) | 2.03  |
| Zn(6)  | 6800(3)  | 6565(1) | 5421(6)  | 10(1) | 1.986 |
| O(1)   | 6013(17) | 5218(8) | -400(30) | 11(3) | 1.586 |
| O(007) | 4707(19) | 6452(9) | 3860(30) | 15(4) | 1.955 |
| O(008) | 7922(19) | 5784(8) | 3740(30) | 12(4) | 2.46  |
| O(009) | 3270(20) | 6800(9) | 8810(30) | 19(4) | 1.62  |
| O(00A) | 9395(18) | 5345(8) | -930(30) | 12(4) | 2.43  |
| O(2)   | 7500(18) | 6560(8) | -930(30) | 13(3) | 2.03  |
| O(3)   | 2790(20) | 7594(9) | 4060(30) | 18(4) | 2.06  |
| O(4)   | 1438(19) | 6261(9) | 4430(30) | 19(4) | 2.12  |

Table S2. Selected bond lengths (Å) and angles (deg.) for PbZnGeO<sub>4</sub>.

|                        |           |                         |           |
|------------------------|-----------|-------------------------|-----------|
| Pb(01)-O(1)            | 2.331(14) | Ge(04)-O(2)             | 1.738(16) |
| Pb(01)-O(1)#1          | 2.419(15) | Ge(04)-O(008)           | 1.747(16) |
| Pb(01)-O(007)          | 2.454(17) | Ge(04)-O(1)             | 1.760(15) |
| Pb(01)-O(009)#2        | 2.652(18) | Ge(04)-O(00A)           | 1.763(15) |
| Pb(01)-Ge(03)          | 3.280(3)  | Zn(5)-O(4)#5            | 1.904(17) |
| Pb(02)-O(009)          | 2.246(18) | Zn(5)-O(00A)#6          | 1.972(16) |
| Pb(02)-O(3)#3          | 2.293(17) | Zn(5)-O(00A)            | 1.972(16) |
| Pb(02)-O(2)#4          | 2.465(16) | Zn(5)-O(008)#7          | 1.976(16) |
| Pb(02)-Ge(03)#3        | 3.299(3)  | Zn(6)-O(007)            | 1.944(16) |
| Ge(03)-O(4)            | 1.702(17) | Zn(6)-O(3)#8            | 1.957(16) |
| Ge(03)-O(009)          | 1.740(17) | Zn(6)-O(2)#3            | 1.971(16) |
| Ge(03)-O(3)            | 1.770(17) | Zn(6)-O(008)            | 1.981(16) |
| Ge(03)-O(007)          | 1.782(16) | O(2)-Ge(04)-O(1)        | 111.6(7)  |
| O(1)-Pb(01)-O(1)#1     | 84.7(3)   | O(008)-Ge(04)-O(1)      | 110.4(7)  |
| O(1)-Pb(01)-O(007)     | 91.3(5)   | O(2)-Ge(04)-O(00A)      | 108.3(7)  |
| O(1)#1-Pb(01)-O(007)   | 85.5(5)   | O(008)-Ge(04)-O(00A)    | 107.6(7)  |
| O(1)-Pb(01)-O(009)#2   | 101.1(5)  | O(1)-Ge(04)-O(00A)      | 108.5(7)  |
| O(1)#1-Pb(01)-O(009)#2 | 155.2(5)  | O(4)#5-Zn(5)-O(00A)#6   | 124.9(7)  |
| O(007)-Pb(01)-O(009)#2 | 70.3(5)   | O(4)#5-Zn(5)-O(00A)     | 110.8(7)  |
| O(009)-Pb(02)-O(3)#3   | 87.5(6)   | O(00A)#6-Zn(5)-O(00A)   | 102.6(5)  |
| O(009)-Pb(02)-O(2)#4   | 86.7(6)   | O(4)#5-Zn(5)-O(008)#7   | 106.5(7)  |
| O(3)#3-Pb(02)-O(2)#4   | 80.0(6)   | O(00A)#6-Zn(5)-O(008)#7 | 105.2(6)  |
| O(4)-Ge(03)-O(009)     | 116.3(9)  | O(00A)-Zn(5)-O(008)#7   | 105.4(7)  |
| O(4)-Ge(03)-O(3)       | 108.9(8)  | O(007)-Zn(6)-O(3)#8     | 109.2(7)  |
| O(009)-Ge(03)-O(3)     | 112.5(8)  | O(007)-Zn(6)-O(2)#3     | 131.7(6)  |
| O(4)-Ge(03)-O(007)     | 105.9(8)  | O(3)#8-Zn(6)-O(2)#3     | 102.6(7)  |
| O(009)-Ge(03)-O(007)   | 111.3(8)  | O(007)-Zn(6)-O(008)     | 99.2(7)   |
| O(3)-Ge(03)-O(007)     | 100.6(8)  | O(3)#8-Zn(6)-O(008)     | 105.9(7)  |
| O(2)-Ge(04)-O(008)     | 110.2(7)  | O(2)#3-Zn(6)-O(008)     | 105.9(7)  |

Symmetry transformations used to generate equivalent atoms:

|                       |                      |
|-----------------------|----------------------|
| #1 -x+1,y,-z+2        | #2 -x+3/2,y-1/2,-z+2 |
| #3 x-1/2,y-1/2,z      | #4 -x+1,y+1,-z+2     |
| #5 x,y+1,z            | #6 x-1/2,y+1/2,z     |
| #7 -x+3/2,y+1/2,-z+2  | #8 -x+3/2,y-1/2,-z+1 |
| #9 x+1/2,y+1/2,z      | #10 x-1,y,z          |
| #11 x,y-1,z           | #12 x+1/2,y-1/2,z    |
| #13 -x+2,y,-z+1       | #14 -x+2,y-1,-z+1    |
| #15 -x+3/2,y+1/2,-z+1 | #16 -x+2,y+1,-z+1    |

Table S3. The calculated dipole moments for the  $\text{ZnO}_4$ ,  $\text{GeO}_4$ , and  $\text{PbO}_3$ , and  $\text{PbO}_4$  structural units for  $\text{PbZnGeO}_4$ .

| structure units   | dipole moments (Debye) |
|-------------------|------------------------|
| $\text{ZnO}_4(5)$ | 1.9892                 |
| $\text{ZnO}_4(6)$ | 2.9125                 |
| $\text{GeO}_4(3)$ | 2.8052                 |
| $\text{GeO}_4(4)$ | 0.8281                 |
| $\text{PbO}_3$    | 14.2245                |
| $\text{PbO}_4$    | 10.9407                |

Table S4. The key physical properties of PZGO and some advanced NIR and mid-IR NLO crystals.

| material           | bandgap (eV) | birefringence        | SHG response | IR cutoff ( $\mu\text{m}$ ) | Ref.      |
|--------------------|--------------|----------------------|--------------|-----------------------------|-----------|
| $\text{KTiOPO}_4$  | ~ 3.52       | 0.092@1064 nm        | ~ 15 × KDP   | ~ 4.3                       | 1,2,3     |
| $\text{KTiOAsO}_4$ | ~ 3.50       | 0.086@1064 nm        | ~ 12 × KDP   | ~ 5.3                       | 2,3       |
| $\text{ZnGeP}_2$   | ~ 2.25       | 0.04@2 $\mu\text{m}$ | ~ 160 × KDP  | ~ 12                        | 4,5       |
| $\text{AgGaS}_2$   | ~ 2.58       | 0.04@2 $\mu\text{m}$ | ~ 35 × KDP   | ~ 12                        | 6         |
| PZGO               | ~ 3.70       | 0.044@1064 nm        | ~ 2.5 × KDP  | ~ 5.9                       | This work |

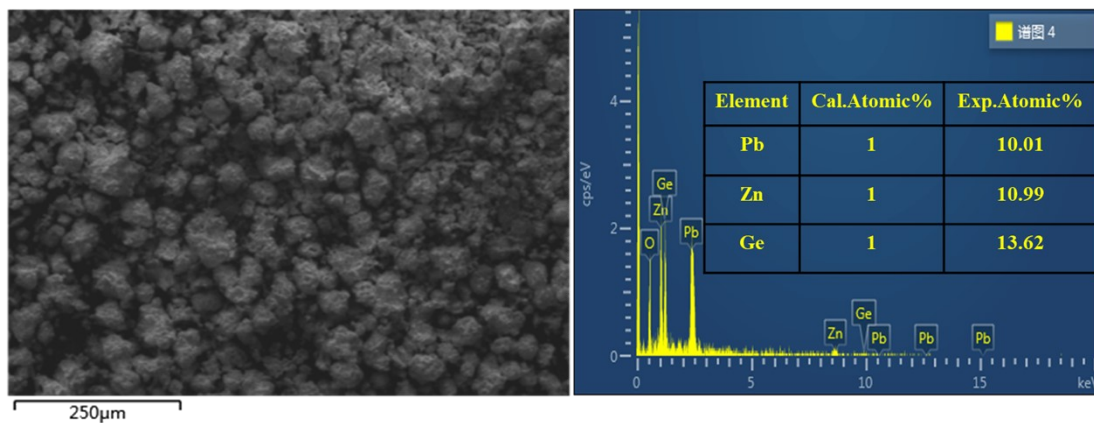

Figure S1. The EDS spectra of PZGO

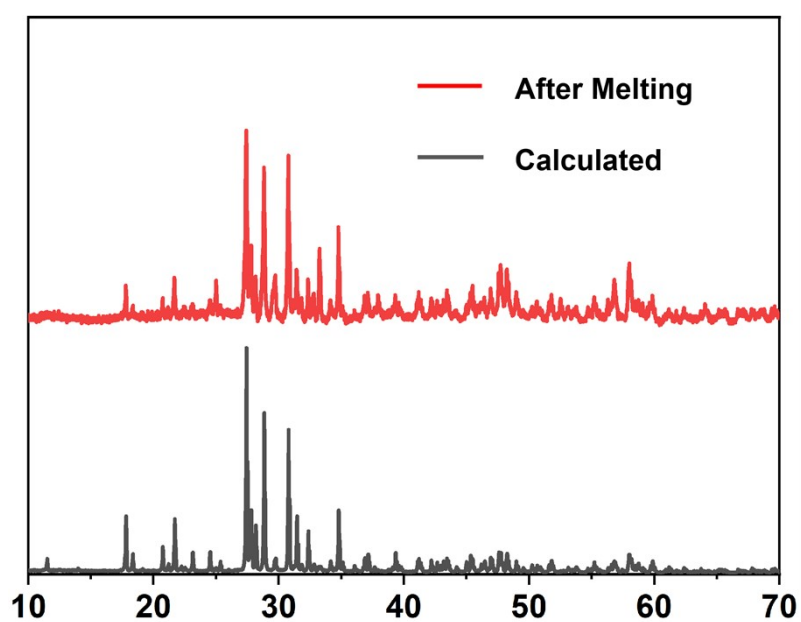

Figure S2. The melted and calculated PXR D patterns of PZGO, respectively

## Reference

1. F. Yang, L. Huang, X. Zhao, L. Huang, D. Gao, J. Bi, X. Wang and G. Zou, An energy band engineering design to enlarge the band gap of  $\text{KTiOPO}_4$  (KTP)-type sulfates via aliovalent substitution., *J. Mater. Chem. C*, 2019, **7**, 8131-8138.
2. H. Zhou, X. He, W. Wu, J. Tong, J. Wang, Y. Zuo, Y. Wu, C. Zhang and Z. Hu, Hydrothermal growth of  $\text{KTiOPO}_4$  crystal for electro-optical application., *Light: Science & Applications*, 2023, **12**, 23.
3. M. V. Pack, D. J. Armstrong and A. V. Smith, Measurement of the  $\chi^{(2)}$  tensors of  $\text{KTiOPO}_4$ ,  $\text{KTiOAsO}_4$ ,  $\text{RbTiOPO}_4$ , and  $\text{RbTiOAsO}_4$  crystals., *Appl. Opt.*, 2004, **43**, 3319-3323.
4. H. Xie, S. Fang, H. Zhao, X. Xu, N. Ye and W. Zhuang, Quasiparticle effects on the linear and nonlinear susceptibility of  $\text{ZnGeP}_2$ ., *RSC Adv.*, 2019, **9**, 35771-35779.
5. G. D. Boyd, E. Buehler and F. G. Storz, LINEAR AND NONLINEAR OPTICAL PROPERTIES OF  $\text{ZnGeP}_2$  AND  $\text{CdSe}$ ., *Appl. Phys. Lett.*, 1971, **18**, 301-304.
6. H.-M. Zhou, L. Xiong, L. Chen, L.-M. Wu, Dislocations that Decrease Size Mismatch within the Lattice Leading to Ultrawide Band Gap, Large Second-Order Susceptibility, and High Nonlinear Optical Performance of  $\text{AgGaS}_2$ ., *Angew. Chem. Int. Ed.*, 2019, **58**, 9979-9983.
